# Supplementary material for: Ti3C2T x /MoS2 Self‐Rolling Rod‐Based Foam Boosts Interfacial Polarization for Electromagnetic Wave Absorption
Source: PubMed Central journal article supplement (PMC9165497; doi:10.1002/advs.202201118), 2022-04-11
Supplement: ADVS-9-2201118-s001.pdf [file ADVS-9-2201118-s001.pdf]

**Ti<sub>3</sub>C<sub>2</sub>T<sub>x</sub>/MoS<sub>2</sub> self-rolling rod-based foam boosts interfacial polarization for electromagnetic wave absorption**

*Minghang Li, Wenjie Zhu, Xin Li, Hailong Xu, Xiaomeng Fan<sup>\*</sup>, Hongjing Wu<sup>\*</sup>, Fang Ye, Jimei Xue, Xiaoqiang Li, Laifei Cheng, Litong Zhang*

Dr. M. Li, Dr. W. Zhu, Dr. X. Li, Prof. X. Fan, Prof. F. Ye, Prof. J. Xue, Prof. X. Li,  
Prof. L. Cheng and Prof. L. Zhang

Science and Technology on Thermostructural Composite Materials Laboratory

Northwestern Polytechnical University, Xi'an, 710072, China

Dr. H. Xu.

Institute of Textiles and Clothing

Hong Kong Polytechnic University

Prof. H. Wu

MOE Key Laboratory of Material Physics and Chemistry under Extraordinary School  
of Physical Science and Technology

Northwestern Polytechnical University, Xi'an 710072, P. R. China

Table S1. The correlation between ratio of interfacial polarization loss ( $\varepsilon_p''$ ) and EMA performance

| Materials                                         | Ratio of $\varepsilon_p''$ | RL (dB) | EAB (GHz) | Ref. |
|---------------------------------------------------|----------------------------|---------|-----------|------|
| Graphene/Fe <sub>3</sub> O <sub>4</sub> /polymer  | 0.76                       | -63     | 6         | [1]  |
| C/NiCo <sub>2</sub> O <sub>4</sub>                | 0.80                       | -52.7   | 5.2       | [2]  |
| CNT/ZnO                                           | 0.25                       | -20.7   | 4.2       | [3]  |
| RGO/Si <sub>3</sub> N <sub>4</sub>                | 0.33                       | -21     | 4.2       | [4]  |
| Ti <sub>3</sub> C <sub>2</sub> T <sub>x</sub> /GO | 0.01                       | -49.1   | 2.9       | [5]  |

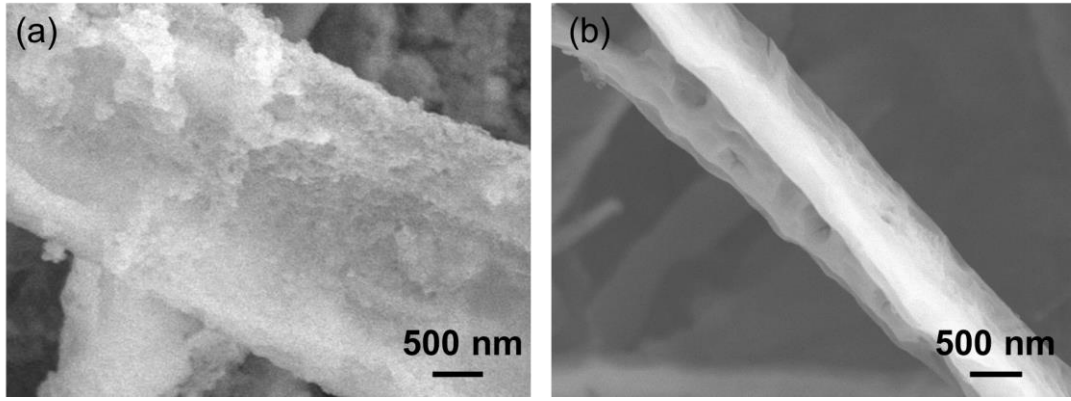

Figure S1. The morphologies of (a)  $\text{Ti}_3\text{C}_2\text{T}_x/\text{ATM}$  and (b)  $\text{Ti}_3\text{C}_2\text{T}_x/\text{MoS}_2$

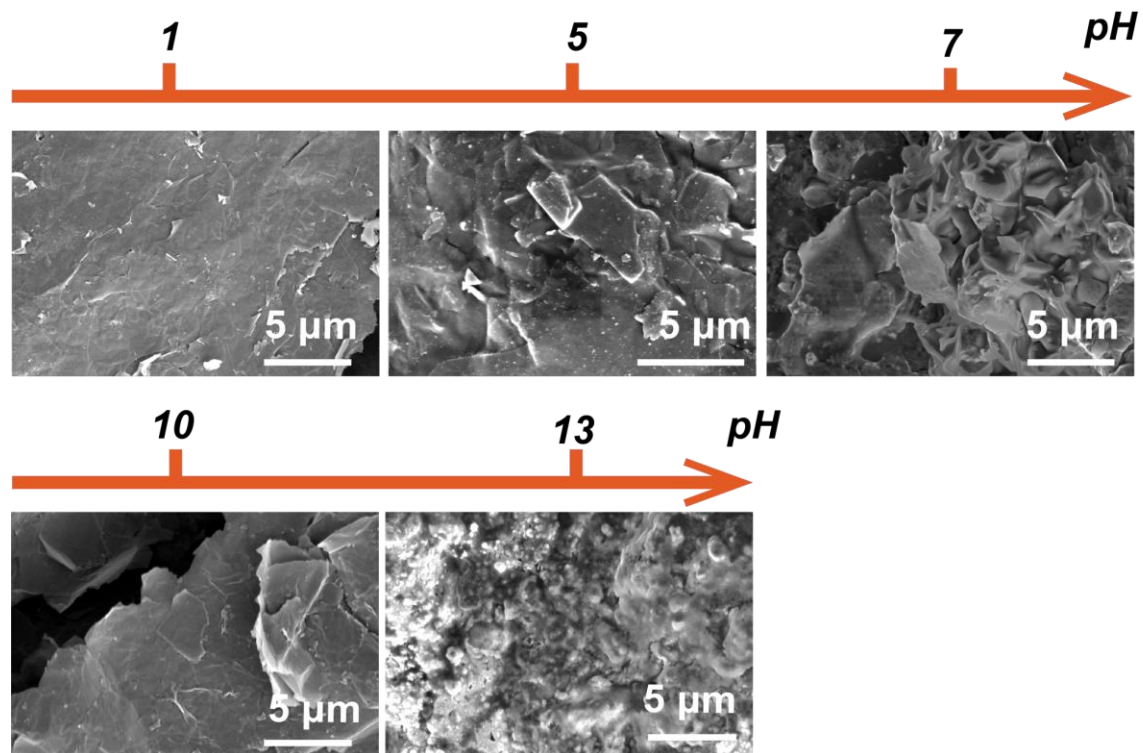

Figure S2. The morphologies of  $\text{Ti}_3\text{C}_2\text{T}_x$  sheets with different solutions: (a) HCl, (b)  $\text{C}_6\text{H}_8\text{O}_7$ , (c) NaCl, (d)  $\text{NH}_4\text{OH}$  and (e) NaOH.

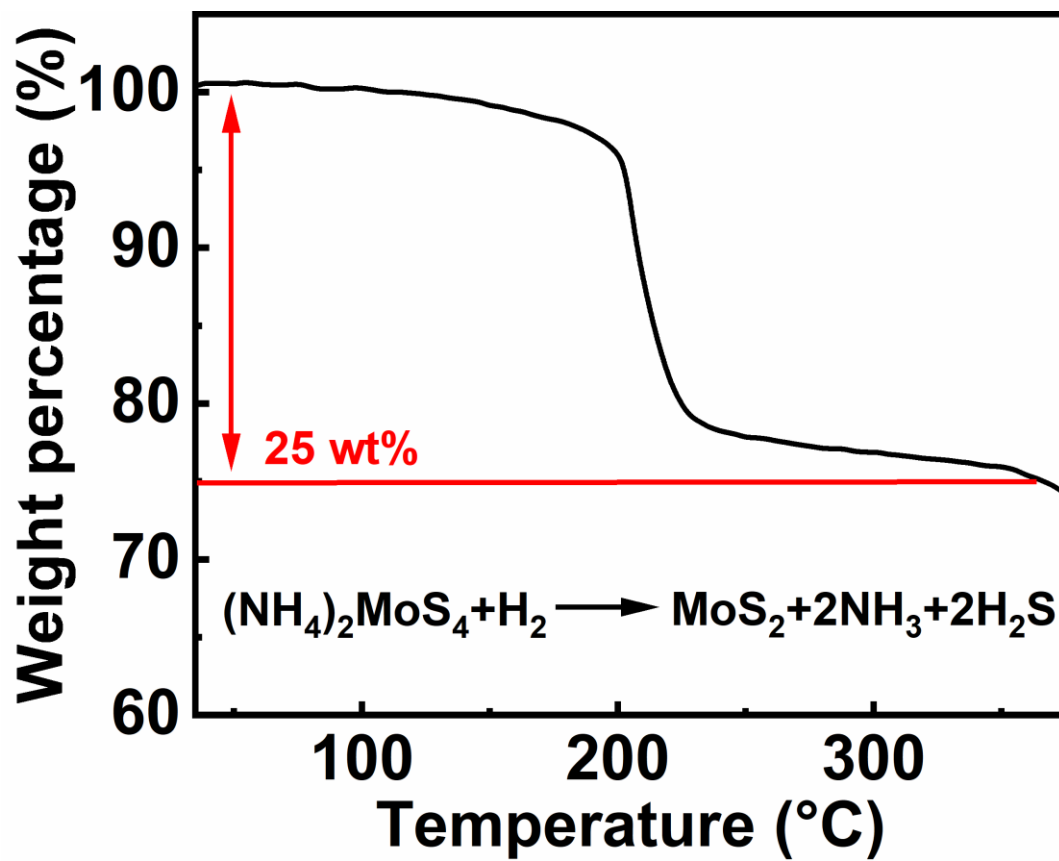

Figure S3. The TG curve of ATM

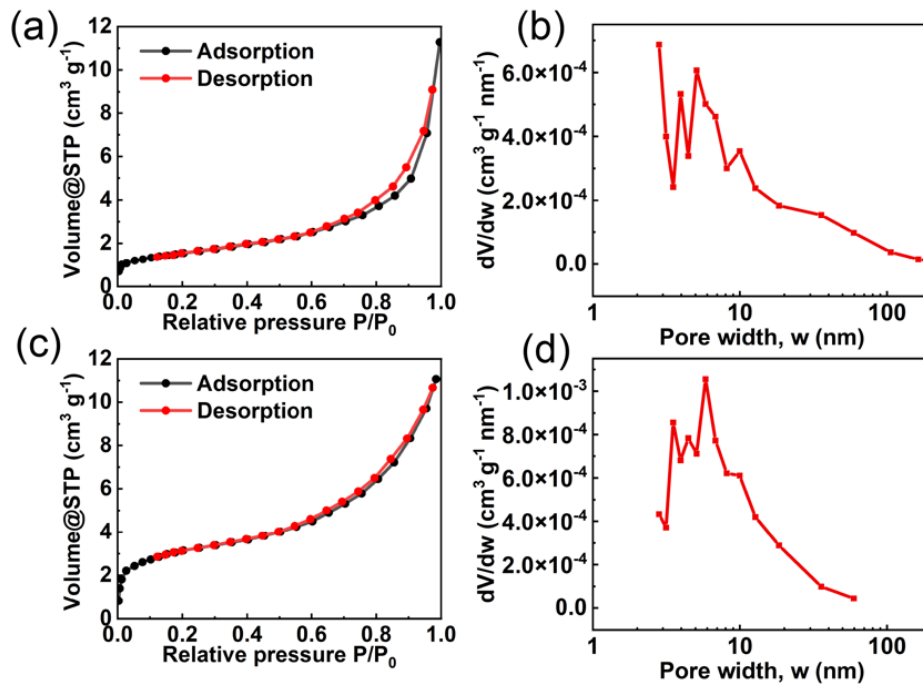

Figure S4. The N<sub>2</sub> sorption isotherms at 77 K and pore size distribution derived from Barrett–Joyner–Halenda (BJH) method of (a, b) Ti<sub>3</sub>C<sub>2</sub>T<sub>x</sub>/MoS<sub>2</sub> self-rolling rod structure and (c, d) Ti<sub>3</sub>C<sub>2</sub>T<sub>x</sub>/MoS<sub>2</sub> sheet structure.

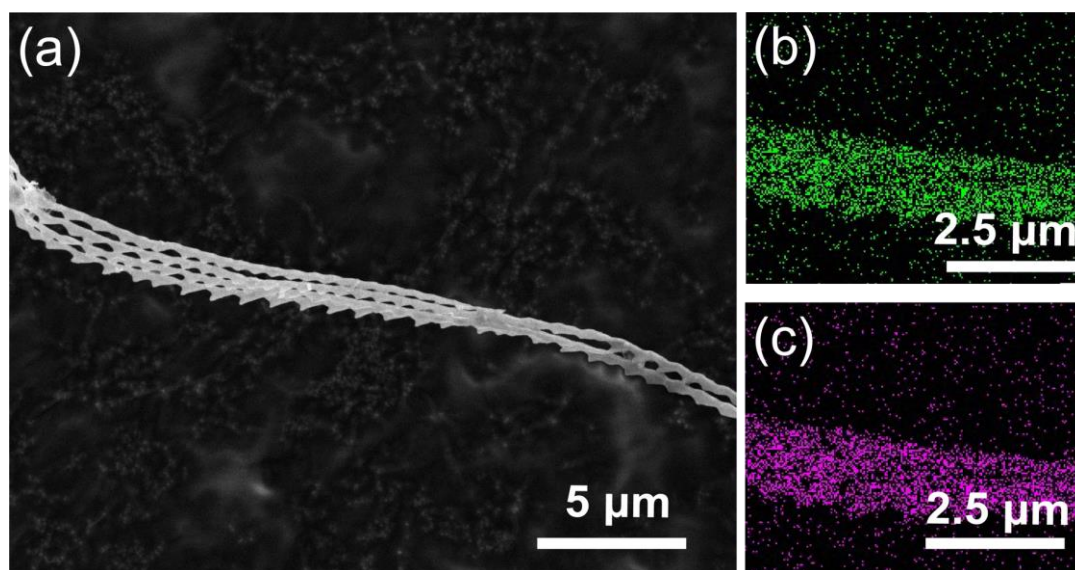

Figure S5. (a) The SEM images of crossed  $\text{Ti}_3\text{C}_2\text{T}_x/\text{MoS}_2$  rods and (b-c) its corresponding EDS results;

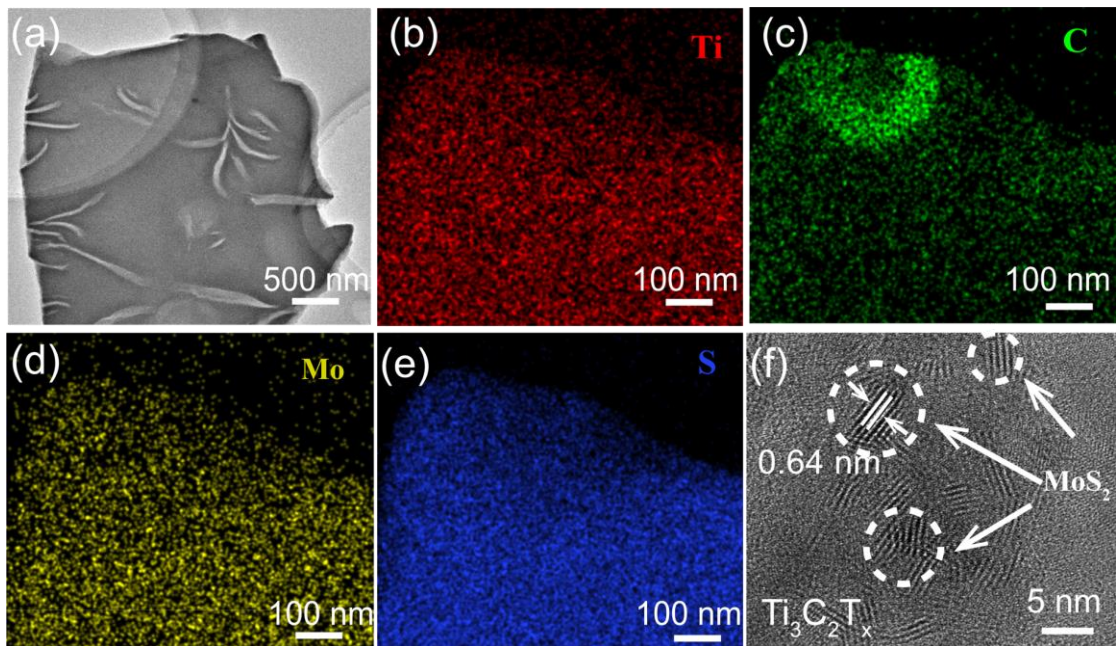

Figure S6. a) The TEM image of sample S2 and b-e) its corresponding EDS results. f) High magnification TEM image of sample S2



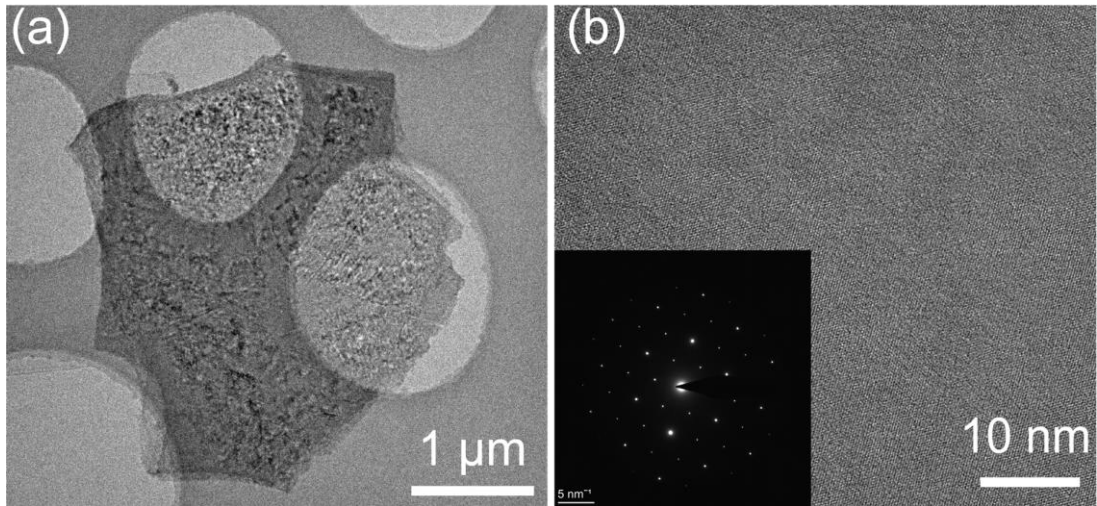

Figure S7. (a) The TEM images of  $\text{Ti}_3\text{C}_2\text{T}_x$  and (b) the corresponding high magnification image.

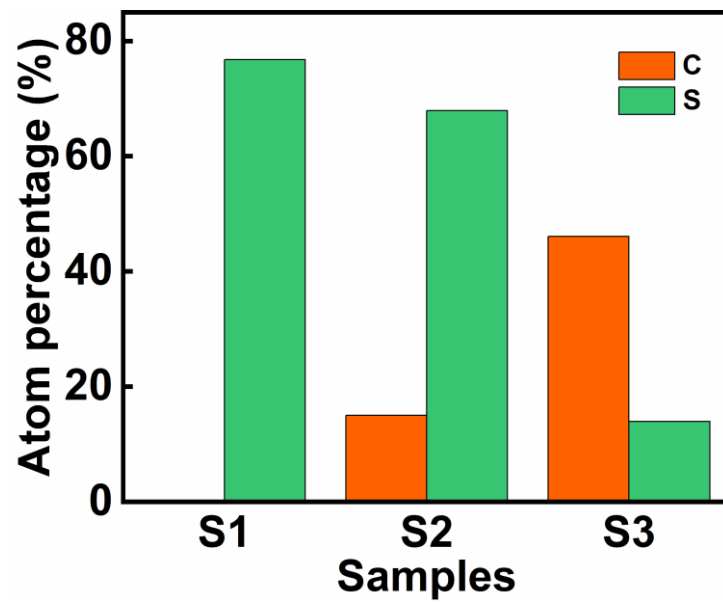

Figure S8. The atom percentage of C and S in different samples.

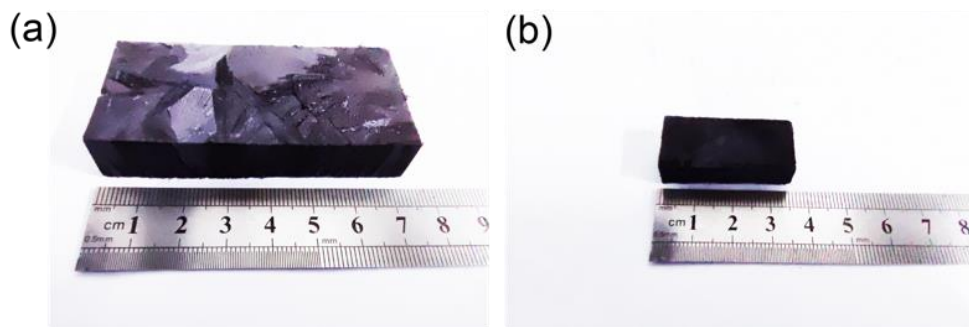

Figure S9. The optical images of foams with sizes of (a) 72 mm \*34 mm \* 10mm and (b) 35 mm \*15 mm \*10 mm.

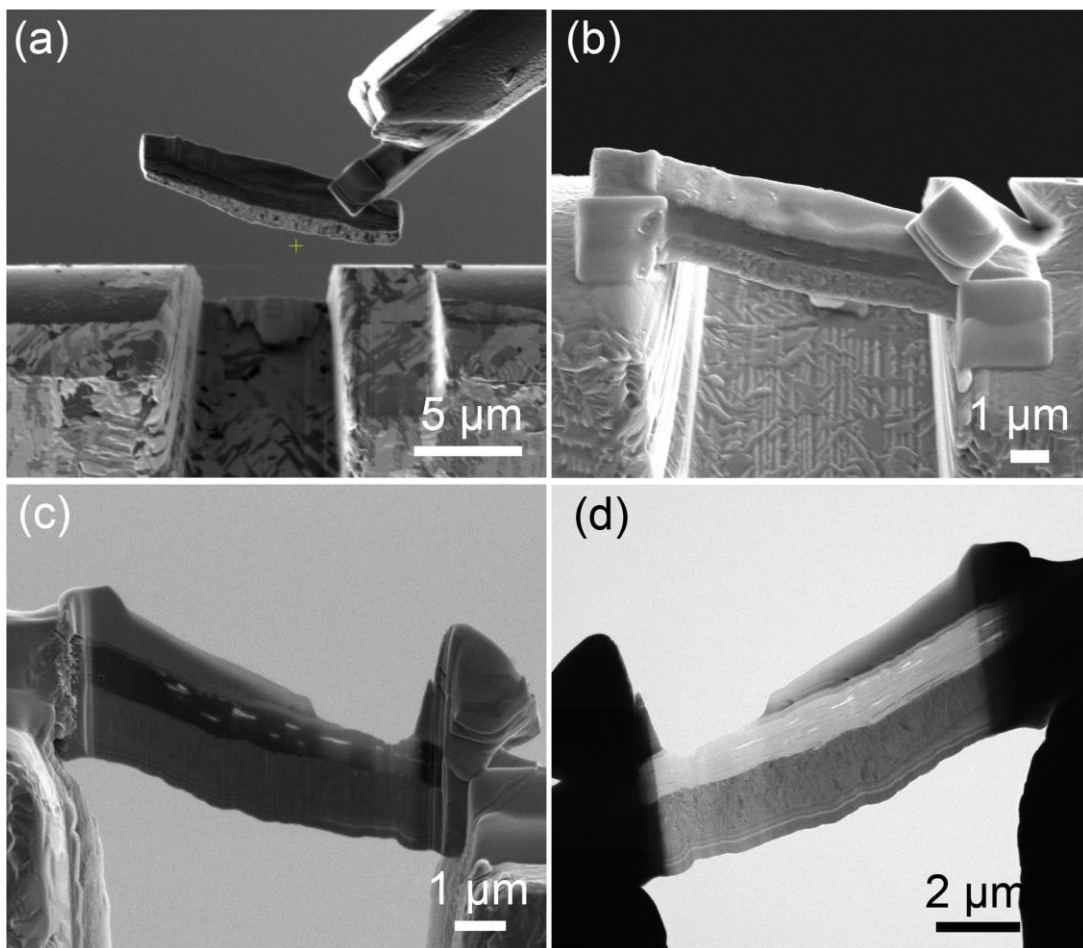

Figure S10. (a) The lift-out process after cutting from  $\text{Ti}_3\text{C}_2\text{T}_x/\text{MoS}_2$  by the focus ion beam. (b) The free lamella is transferred into the slot position on the TEM half-grid. (c) The SEM image of the final thinned lamella and (d) its corresponding TEM image.

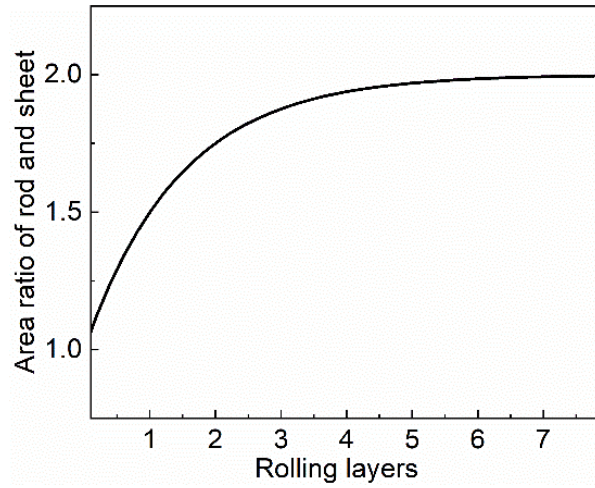

Figure S11. The relationship between rolling layers and area ratio of self-rolling rod structure and sheet structure.

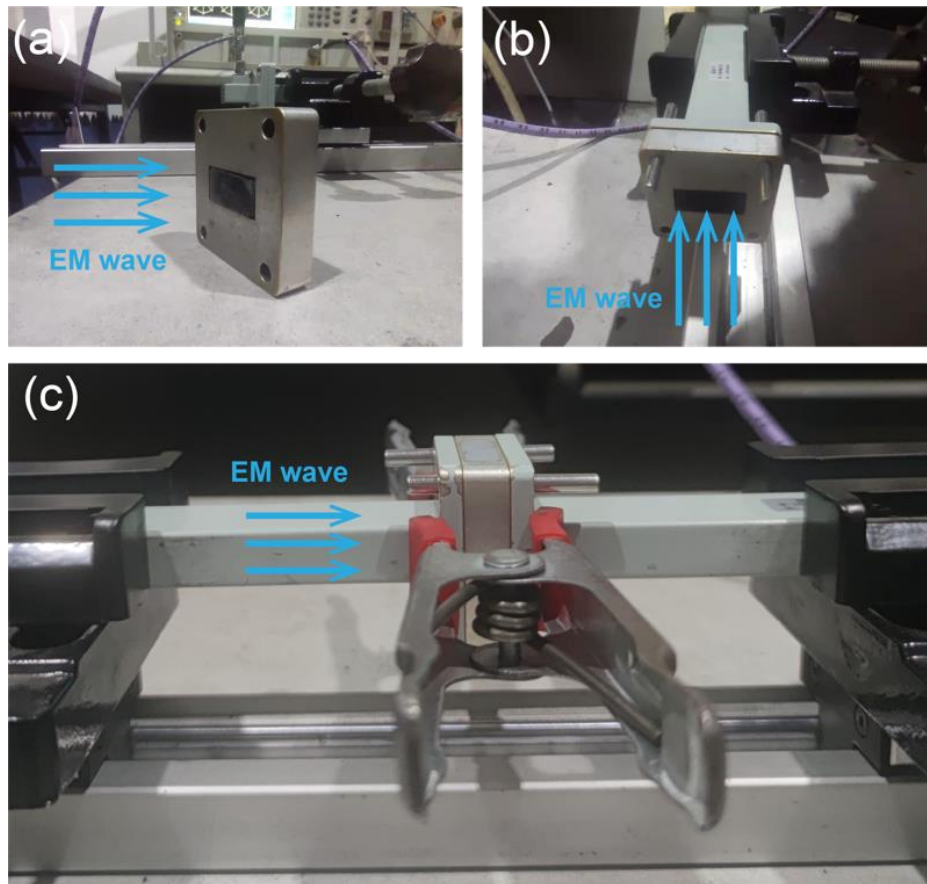

Figure S12. (a) The sample in flange. (b) The flange with sample in wave guide cavity. (c) The test image of wave guide method.

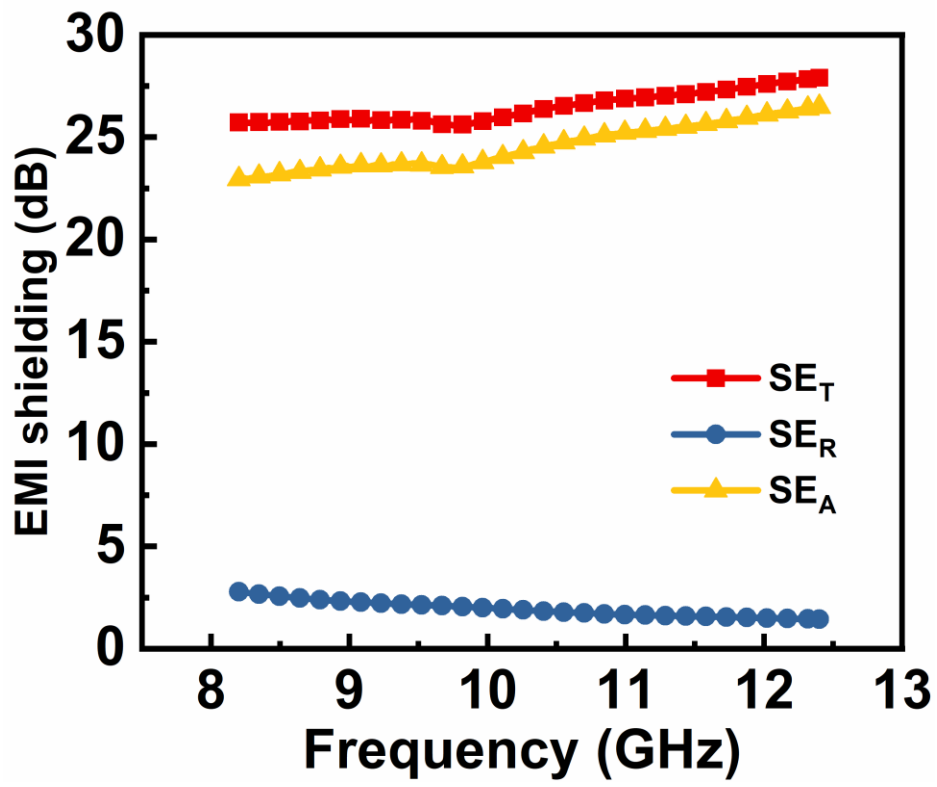

Figure S13. The EMI shielding efficiency of Ti<sub>3</sub>C<sub>2</sub>T<sub>x</sub> foam with a density of 5 mg cm<sup>-3</sup>

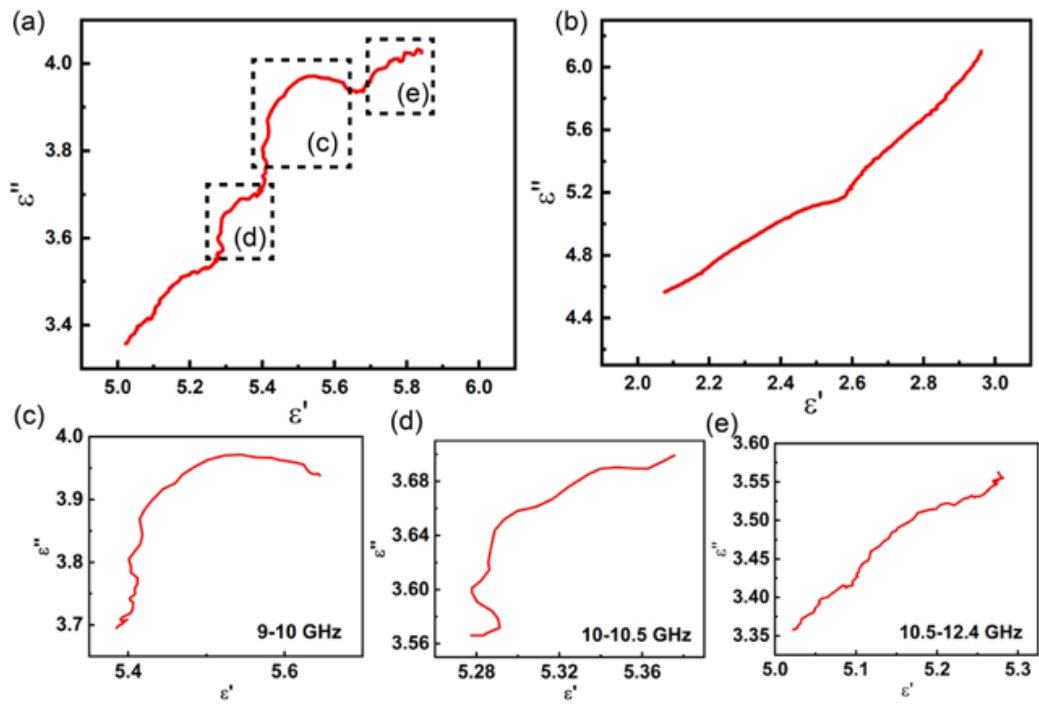

Figure S14. The *Cole-Cole* plots of (a)  $\text{Ti}_3\text{C}_2\text{T}_x/\text{MoS}_2$  self-rolling rod and (b)  $\text{Ti}_3\text{C}_2\text{T}_x/\text{MoS}_2$  sheet. (c-e)

The magnification plots of inset Figure S14a

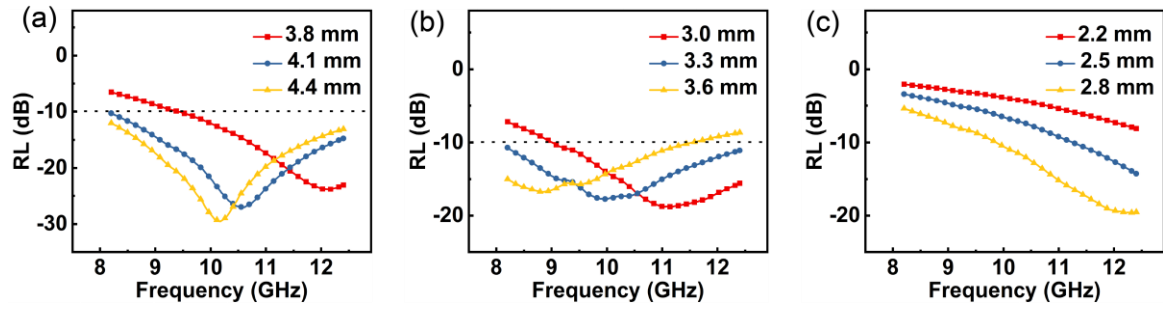

Figure S15. The RL curves with different thickness of samples (a) S1, (b) S2 and (c) S3.

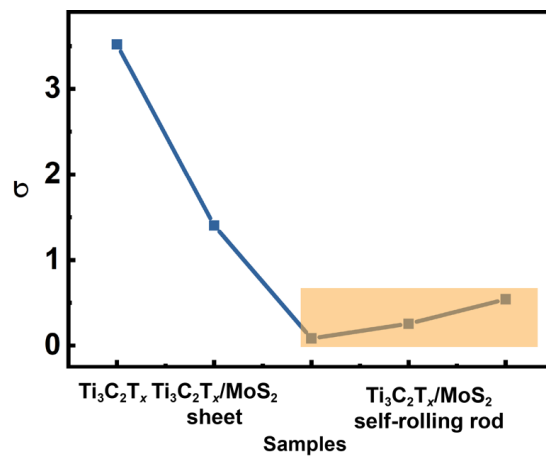

Figure S16. The electrical conductivity of all samples.

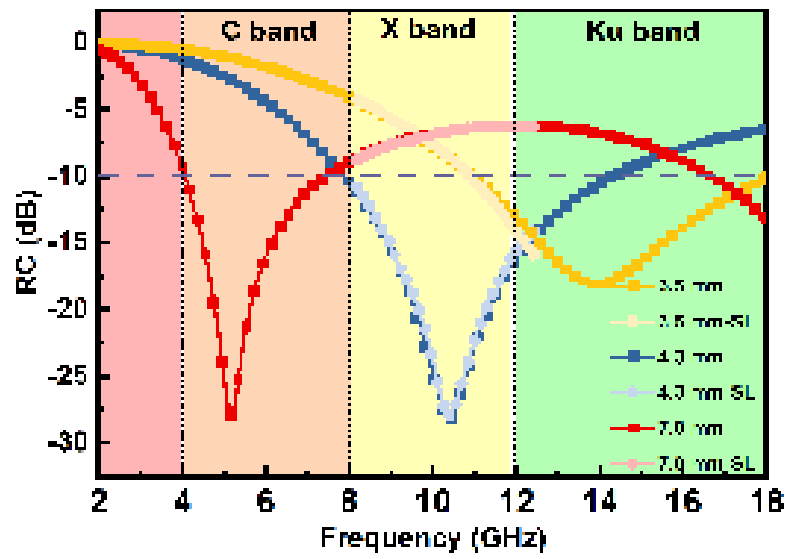

Figure S17. The simulated EMA performance in 2-18 GHz based on the results of CST microwave studio

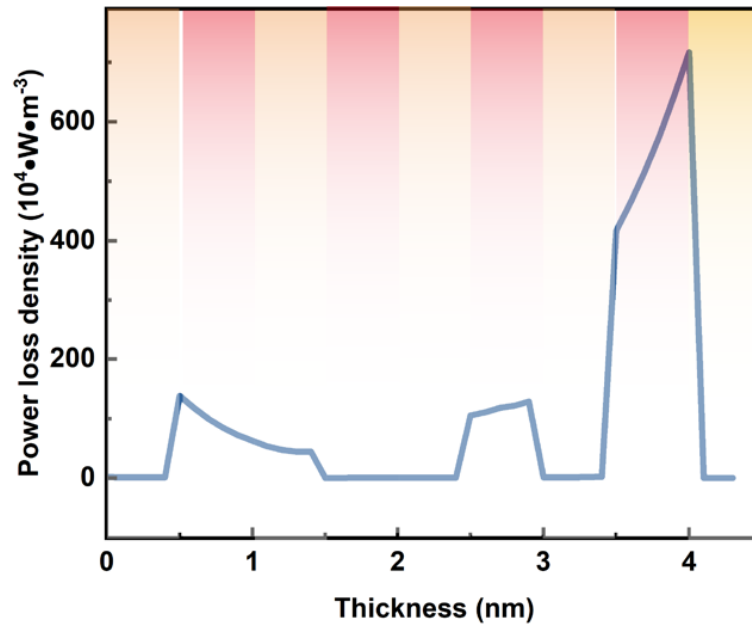

Figure S18. The distribution of power loss density in nine-layer model (red color for MoS<sub>2</sub> and yellow color for Ti<sub>3</sub>C<sub>2</sub>T<sub>x</sub>).

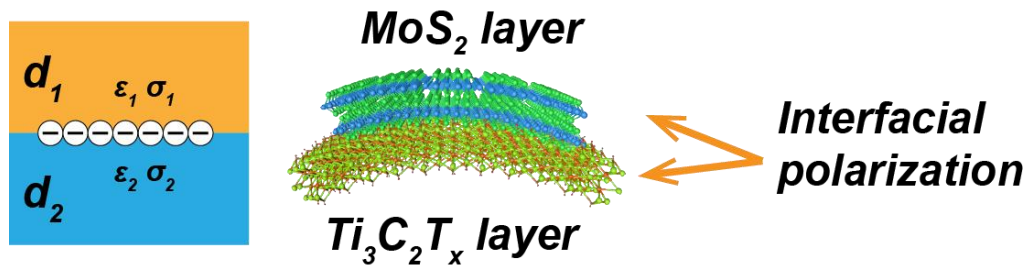

Figure S19. The Maxwell-Wagner effect in Ti<sub>3</sub>C<sub>2</sub>T<sub>x</sub>/MoS<sub>2</sub> foams



## The simulation of power loss density:

The EM simulation was carried out by using CST microwave studio suite (2020).

Periodic structures template with metamaterial-full structure workflow was chose for simulation. Frequency domain solver was used in this simulation process. The overall properties of this simulation are shown in Figure S20a.

To speed up the meshing and simulation process, we scale up the model to millimeter scale (more than 100-million-unit cells must be calculated without scale-up). The wave-guide port was set along the along the layer, which means that the incident direction of EM wave was vertical to the model. The incident direction of EM wave in Figure 4e have been corrected in revised manuscript.

The setup of solver parameters is shown in Figure S20c, tetrahedral mesh type was used to mesh these models.

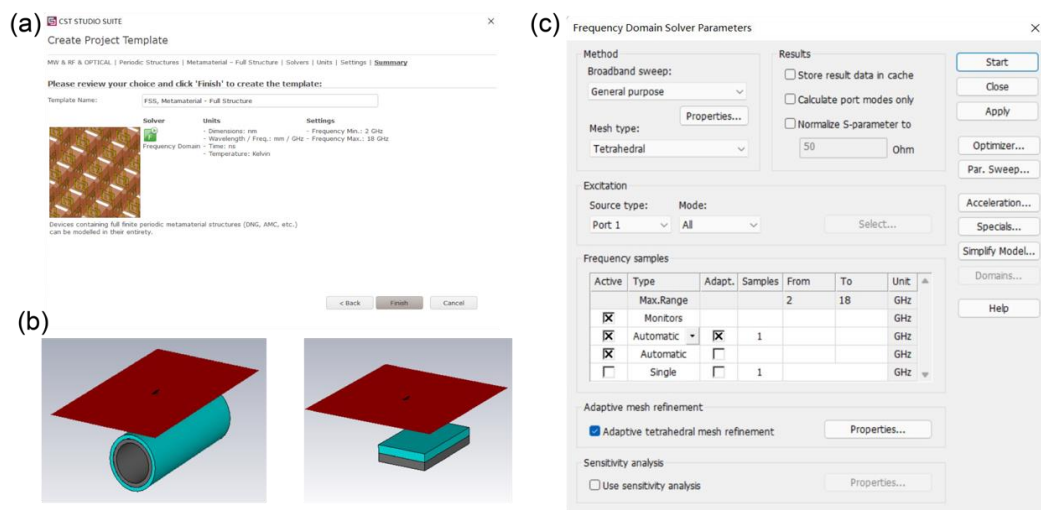

Figure S20. (a) The overall parameters of the simulation project. (b) The model of rod structure and sheet structure in CST microwave studio. (c) The setup of solver parameters.

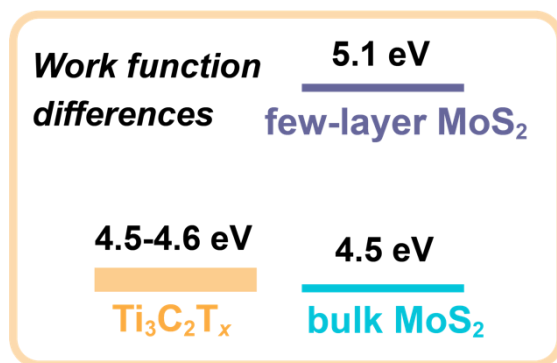

Figure S21. The work function differences of Ti<sub>3</sub>C<sub>2</sub>T<sub>x</sub>, bulk MoS<sub>2</sub> and few-layer MoS<sub>2</sub>.

Table S2 Comparison of ratio of polarization loss with recently reported works

| Samples                                                             | Ration of $\varepsilon_p''$ | Refs.            |
|---------------------------------------------------------------------|-----------------------------|------------------|
| Co <sub>3</sub> O <sub>4</sub> -MWCNT                               | ~0.25                       | [6]              |
| Graphene/Fe <sub>3</sub> O <sub>4</sub> /polymer                    | ~0.76                       | [1]              |
| Ti <sub>3</sub> C <sub>2</sub> T <sub>x</sub> @graphene hydrogel    | ~0.01                       | [5]              |
| Red-blood cell like carbon sphere                                   | ~0.6                        | [7]              |
| RGO/Si <sub>3</sub> N <sub>4</sub>                                  | ~0.17                       | [4]              |
| <b>Ti<sub>3</sub>C<sub>2</sub>T<sub>x</sub>/MoS<sub>2</sub> rod</b> | <b>0.88</b>                 | <b>This work</b> |

Table S3 EM absorption performance of representative foam-based absorbers

| Samples                                                                   | Matrix                         | Density<br>( $\text{mg}\cdot\text{cm}^{-3}$ ) | RL $\leq$ -10dB |              | SMAP<br>( $\text{dB}\cdot\text{cm}^2\cdot\text{g}^{-1}$ ) | Refs.                |
|---------------------------------------------------------------------------|--------------------------------|-----------------------------------------------|-----------------|--------------|-----------------------------------------------------------|----------------------|
|                                                                           |                                |                                               | $d$ (mm)        | EAB<br>(GHz) |                                                           |                      |
| Ti <sub>3</sub> C <sub>2</sub> T <sub>x</sub> /SiC <sub>nws</sub><br>foam | Air                            | 0.029                                         | 3.9             | 4.2          | 1407                                                      | [8]                  |
| Ti <sub>3</sub> C <sub>2</sub> T <sub>x</sub> foam                        | Paraffin                       | ~0.8                                          | 1.4             | 4.2          | 129.46                                                    | [9]                  |
| RGO/ZnO <sub>nws</sub>                                                    | PDMS                           | >0.097                                        | 4.8             | 4.2          | ~380.2                                                    | [10]                 |
| CNWs/Si <sub>3</sub> N <sub>4</sub>                                       | Si <sub>3</sub> N <sub>4</sub> | ~1.97                                         | 3.2             | 4.2          | 28.4                                                      | [11]                 |
| RGO/SiC <sub>nws</sub>                                                    | PDMS                           | >0.097                                        | 3               | 4.2          | 512                                                       | [12]                 |
| RGO foam                                                                  | Paraffin                       | ~0.9                                          | 10              | 4.2          | 22.7                                                      | [13]                 |
| MXene-Ni-GO                                                               | Air                            | 6.45                                          | 2.15            | 2.4          | 5065                                                      | [14]                 |
| H-RGO                                                                     | Air                            | 6.1                                           | 3.4             | 3.2          | 4224                                                      | [15]                 |
| SiC foam                                                                  | Air                            | 11.56                                         | 3.5             | 1.2          | 511.97                                                    | [16]                 |
| Carbon aerogel                                                            | Air                            | 6.1                                           | 3.5             | 4.2          | 4037                                                      | [17]                 |
| <b>Ti<sub>3</sub>C<sub>2</sub>T<sub>x</sub>/MoS<sub>2</sub> S1</b>        | <b>Air</b>                     | <b>0.013</b>                                  | <b>3.9</b>      | <b>4.2</b>   | <b>6129.3</b>                                             | <b>This<br/>work</b> |
| <b>Ti<sub>3</sub>C<sub>2</sub>T<sub>x</sub>/MoS<sub>2</sub> S2</b>        | <b>Air</b>                     | <b>0.014</b>                                  | <b>3.1</b>      | <b>4.2</b>   | <b>5512.3</b>                                             | <b>This<br/>work</b> |

## Calculation process of polarization loss and conductive loss:

The calculation process of  $\varepsilon_p''$  and  $\varepsilon_c''$  is based on Debye theory:

$$\varepsilon' = \varepsilon_\infty + \frac{\varepsilon_s - \varepsilon_\infty}{1 + \omega^2 \tau^2} \quad (0.1)$$

$$\varepsilon'' = \varepsilon_p'' + \varepsilon_c'' = \frac{\varepsilon_s - \varepsilon_\infty}{1 + \omega^2 \tau^2} \omega \tau + \frac{\sigma}{\omega \varepsilon_0} \quad (0.2)$$

Non-linear least squares method is used to calculate the  $\varepsilon_p''$  and  $\varepsilon_c''$  [7]. A Python package Scipy to simplify our code<sup>[18]</sup>. The detailed code is shown following.

```
1. import numpy as np
2. from scipy.optimize import least_squares
3. import xlrd
4. def realimag(array):
5.     return np.array([(x.real, -x.imag) for x in array])
6. def func(w,p):
7.     s,u,sigma,t=p
8.     d=complex(0,1)
9.     o=8.854187817*10**(-12)
10.    return realimag(u+(s-u)/(1+np.dot(d,np.dot(w,t)))-np.dot(d,np.divide(sigma,np.dot(w,o))))
11. def funcresult_conducloss(w,p):
12.     s,u,sigma,t=p
13.     o=8.854187817*10**(-12)
14.     return np.divide(sigma,np.dot(w,o))
15. def residuals(p, y,x):
16.     return (realimag(np.array(y)) - func(x, p)).flatten()
17. p0 = [100,100,30,10**-11]
18. data=xlrd.open_workbook('permittivity.xlsx')
19. table=data.sheets()[0]
20. fsig=0
21. ft=0
22. fp1sq=[]
23. fs=0
24. fu=0
25. fconducloss=0
26. fpolarloss=0
27. fcost=0
28. for i in range(1,21):
29.     end=i*10
30.     start=end-10
```

```

31. xdata=table.col_values(0)[start:end]
32. ydata_1=table.col_values(2)[start:end]
33. ydata_2=table.col_values(1)[start:end]
34. ydata=[]
35. for i in range(10):
36.     ydata.append(complex(ydata_2[i],-ydata_1[i]))
37. plsq = least_squares(residuals, p0, bounds=([0,0,0,0],[200,200,10
0,10**-10]),args=(ydata, xdata),max_nfev=10000000)
38. fplsq.append(plsq)
39. conducloss=np.mean(funcrestult_conducloss(xdata,plsq.x))
40. fconducloss+=conducloss
41. polarloss=np.mean(ydata_1)-conducloss
42. fpolarloss+=polarloss
43. fsig=fsig+plsq.x[2]
44. fs=fs+plsq.x[0]
45. fu=fu+plsq.x[1]
46. ft=ft+plsq.x[3]
47. fcost=plsq.cost+fcost
48. print(fs/20)
49. print(fu/20)
50. print(fsig/20)
51. print(ft/20)
52. print(fpolarloss/20) # polarization loss
53. print(fconducloss/20) #conductive loss
54. print(fpolarloss/(fpolarloss+fconducloss))
55. print(fcost/20)

```

## References:

- [1] J. C. Shu, M. S. Cao, M. Zhang, X. X. Wang, W. Q. Cao, X. Y. Fang, M. Q. Cao, *Adv. Funct. Mater.* **2020**, 30, 1908299.
- [2] C. Han, M. Zhang, W. Cao, M. Cao, *Carbon* **2021**, 171, 953.
- [3] M. Lu, W. Cao, H. Shi, X. Fang, J. Yang, Z. Hou, H. Jin, W. Wang, J. Yuan, M. Cao, *J. Mater. Chem.A* **2014**, 2, 10540.
- [4] Z. Hou, X. Yin, H. Xu, H. Wei, M. Li, L. Cheng, L. Zhang, *ACS Appl. Mater. Interfaces* **2019**, 11, 5364.
- [5] Y. Li, F. Meng, Y. Mei, H. Wang, Y. Guo, Y. Wang, F. Peng, F. Huang, Z. Zhou, *Chem. Eng. J.* **2020**, 391, 123512.
- [6] J. Shu, X. Huang, M. Cao, *Carbon* **2021**, 174, 638.
- [7] H. Xu, X. Yin, M. Li, F. Ye, M. Han, Z. Hou, X. Li, L. Zhang, L. Cheng, *Carbon* **2018**, 132, 343.

- [8] X. Li, X. Yin, H. Xu, M. Han, M. Li, S. Liang, L. Cheng, L. Zhang, *ACS Appl. Mater. Interfaces* **2018**, 10, 34524.
- [9] K. Hu, H. Wang, X. Zhang, H. Huang, T. Qiu, Y. Wang, C. Zhang, L. Pan, J. Yang, *Chem. Eng. J.* **2020**, 408, 127283.
- [10] C. Song, X. Yin, M. Han, X. Li, Z. Hou, L. Zhang, L. Cheng, *Carbon* **2017**, 116, 50.
- [11] H. Pan, X. Yin, J. Xue, L. Cheng, L. Zhang, *Carbon* **2016**, 107, 36.
- [12] M. Han, X. Yin, Z. Hou, C. Song, X. Li, L. Zhang, L. Cheng, *ACS Appl Mater Interfaces* **2017**, 9, 11803.
- [13] Y. Zhang, Y. Huang, H. Chen, Z. Huang, Y. Yang, P. Xiao, Y. Zhou, Y. Chen, *Carbon* **2016**, 105, 438.
- [14] L. Liang, Q. Li, X. Yan, Y. Feng, Y. Wang, H. B. Zhang, X. Zhou, C. Liu, C. Shen, X. Xie, *ACS Nano* **2021**, 15, 6622.
- [15] M. Zhang, X. Fang, Y. Zhang, J. Guo, C. Gong, D. Estevez, F. Qin, J. Zhang, *Nanotechnology* **2020**, 31, 275707.
- [16] X. Ye, Z. Chen, M. Li, T. Wang, C. Wu, J. Zhang, Q. Zhou, H. Liu, S. Cui, *J. Alloys Compd.* **2020**, 817.
- [17] L. Liang, Z. Zhang, F. Song, W. Zhang, H. Li, J. Gu, Q. Liu, D. Zhang, *Carbon* **2020**, 162, 283.
- [18] S. v. d. Walt, S. C. Colbert, G. Varoquaux, *Comput. Sci. Eng.* **2011**, 13, 22.
